# Supplementary material for: The Use of Superb Microvascular Imaging in Evaluating Rheumatic Diseases: A Systematic Review
Source: MDPI journal article supplement (doi:10.3390/medicina59091641), 2023-09-11
Supplement: s1 [file s1]

**Supplemental Table S1** Baseline characteristics of identified studies and the US technique

| Author<br>Country, year                       | Disease | Disease course/<br>±Controls<br>Sample size           | Model                      | Transducer, MHz                                                 | Scanned joint or region                                                                                         | Planes                   | SMI<br>modes | Comparing<br>instrumental tools                                      | SMI scoring system                               |
|-----------------------------------------------|---------|-------------------------------------------------------|----------------------------|-----------------------------------------------------------------|-----------------------------------------------------------------------------------------------------------------|--------------------------|--------------|----------------------------------------------------------------------|--------------------------------------------------|
| <b>Matsuo et al. (11)</b><br>Japan, 2022      | RA      | Relapse<br>210                                        | Aplio 500                  | 12 MHz linear (18L7)                                            | Bilaterally: MCP II-V, radial wrist, ulnar wrist, MTP II-V, Lisfranc, cuneonavicular, Chopart, and ankle joints | N/A                      | N/A          | Only US SMI examination (for comparing machine learning classifiers) | Semi-quantitive scale (four-point 0-3)           |
| <b>Diao et al. (16)</b><br>China, 2022        | RA      | Active/<br>Remission<br>63/48                         | Aplio i700                 | Multifrequency 12-14 MHz linear                                 | Bilaterally: MCP I-V, PIP I-V, knee, wrist, and ankle joints                                                    | Axial, longitudinal      | N/A          | SMI vs. CEUS                                                         | Semi-quantitive scale (four-point 0-3)           |
| <b>Matsuo et al. (12)</b><br>Japan, 2021      | RA      | Remission/<br>Relapse<br>112/9                        | Aplio 500                  | 12 MHz linear (18L7)                                            | Bilaterally: MCP II-V, radial wrist, ulnar wrist, MTP II-V, Lisfranc, cuneonavicular, Chopart, and ankle joints | Based on OMERACT         | Color        | SMI result among groups                                              | Semi-quantitive scale (four-point 0-3)           |
| <b>Kandemirli et al. (21)</b><br>Turkey, 2021 | JIA     | Active<br>30                                          | Aplio 500                  | 14 MHz                                                          | Knee, hip, ankle, wrist, elbow joints; flexor hallucis longus/tibialis posterior tendons                        | Longitudinal, transverse | N/A          | SMI vs. PD                                                           | Semi-quantitative scale (four-point 0-3)         |
| <b>Nas et al. (22)</b><br>Turkey, 2021        | BD      | Active<br>14                                          | Aplio 500 or<br>Aplio i600 | High-frequency linear                                           | Distal posterior tibial, anterior tibial, distal superficial femoral, and peroneal arteries                     | N/A                      | Both         | SMI vs. PD vs. DSA                                                   | Semi-quantitative scale (types I-IV)             |
| <b>Wang et al. (17)</b><br>China, 2021        | AS      | Remission/<br>Controls<br>60/30                       | N/A                        | N/A                                                             | Sacroiliac joint                                                                                                | N/A                      | N/A          | SMI vs. SWE result among groups                                      | -                                                |
| <b>Ünal et al. (23)</b><br>Turkey, 2020       | JIA     | N/A – Swelling<br>or Arthralgia/<br>Controls<br>22/24 | Aplio 500                  | N/A                                                             | Knee joint; infraarticular and supraarticular soft tissue (fat pads)                                            | Longitudinal, transverse | N/A          | SMI vs. PD vs. SWE                                                   | Vascularity index                                |
| <b>Jin X al. (18)</b><br>China, 2020          | RA      | Active/<br>Controls<br>41/20                          | Aplio 500                  | 14 MHz high-frequency                                           | Suprapatellar recess of the knee joints                                                                         | N/A                      | N/A          | SMI vs. PD vs. CD                                                    | Semi-quantitive scale (four-point, 0-III grades) |
| <b>Oo et al. (25)</b><br>Australia, 2020      | OA      | N/A<br>89                                             | Aplio 500                  | Multi-frequency linear (using 10 MHz with 14 L5 MHz transducer) | Suprapatellar, medial and lateral parapatellar knee recesses                                                    | Longitudinal, transverse | N/A          | SMI vs. PD vs. radiography and MRI                                   | Semi-quantitive scale (four-point 0-3)           |

|                                                 |                                          |                                                                   |            |                                               |                                                                                                                                                           |                          |       |                              |                                          |
|-------------------------------------------------|------------------------------------------|-------------------------------------------------------------------|------------|-----------------------------------------------|-----------------------------------------------------------------------------------------------------------------------------------------------------------|--------------------------|-------|------------------------------|------------------------------------------|
| <b>Matsuo et al. (13)</b><br>Japan, 2020        | RA                                       | N/A<br>293                                                        | Aplio 500  | 12 MHz linear                                 | Bilaterally: MCP II-V, radial wrist, ulnar wrist, MTP II-V, Lisfranc, cuneonavicular, Chopart, and ankle joints                                           | N/A                      | Color | SMI with B-mode among groups | Semi-quantitive scale (four-point 0-3)   |
| <b>Ustabasıoğlu et al. (24)</b><br>Turkey, 2020 | pSS                                      | N/A/ Controls<br>20/20                                            | Aplio 500  | 5-14 MHz linear                               | Parotid and submandibular glands                                                                                                                          | Longitudinal, transverse | N/A   | SMI vs. PD vs. CD            | Vascularity index                        |
| <b>Lee et al. (27)</b><br>South Korea, 2019     | RA                                       | N/A/ Controls<br>56/5                                             | Aplio 500  | 14 MHz                                        | Bilaterally: wrists, MCP, and PIP                                                                                                                         | N/A                      | N/A   | SMI vs. PD vs. B-mode        | Semi-quantitive scale (four-point 0-3)   |
| <b>Horie et al. (14)</b><br>Japan, 2019         | RA                                       | Prodrome of arthritis<br>15 rats                                  | Aplio i800 | Ultrahigh - frequency (8-24 MHz, used 12 MHz) | Ankle joints                                                                                                                                              | Longitudinal             | N/A   | SMI vs. PD                   | Vascularity index                        |
| <b>Yu et al. (19)</b><br>China, 2018            | RA                                       | Remission<br>26                                                   | Aplio 500  | 5-14 MHz broadband linear                     | Bilaterally: wrists, MCP, and PIP                                                                                                                         | N/A                      | N/A   | SMI vs. PD                   | Semi-quantitive scale (four-point 0-3)   |
| <b>Lim et al. (28)</b><br>United Kingdom, 2018  | RA<br>OA<br>PsA<br>IA<br>Only arthralgia | N/A - Arthralgia/<br>Controls<br>83/10                            | Aplio 500  | 18 MHz                                        | Radiocarpal, MCP, PIP, and CMC joints; In 5 patients – tarso-metatarsal, talo-navicular or tibio-talar joints<br>In 2 patients – acromioclavicular joints | Longitudinal, transverse | N/A   | SMI vs. PD                   | Semi-quantitive scale (four-point 0-3)   |
| <b>Yokota et al. (15)</b><br>Japan, 2018        | RA and Non-RA*                           | Active RA/Non-RA<br>27/12                                         | Aplio 300  | 9 or 18 MHz linear                            | Bilaterally: MCP, PIP, IP joints, wrists, elbows, knees                                                                                                   | Longitudinal             | Color | SMI vs. PD                   | Semi-quantitative scale (four-point 0-3) |
| <b>Orlandi et al. (26)</b><br>Italy, 2017       | RA                                       | N/A/ Controls<br>30 RA (15 early RA, 15 RA under RTX treatment)/5 | Aplio 400  | 7-18 MHz broadband linear-array               | Bilaterally: ulnar recess, MCP I-V and PIP I-V joints                                                                                                     | Axial, longitudinal      | N/A   | SMI vs. PD vs. B-mode        | Semi-quantitative scale (four-point 0-3) |
| <b>Li et al. (20)</b><br>China, 2016            | RA                                       | N/A/<br>Controls<br>75/10                                         | Aplio 500  | 18 MHz broad band linear array                | MCP, PIP joints                                                                                                                                           | Longitudinal             | N/A   | SMI vs. PD                   | Semi-quantitative scale (four-point 0-3) |

AOSSD = adult-onset Still's disease; AS = ankylosing spondylitis; BD = Buerger's disease; CD = color Doppler; CEUS = contrast-enhanced ultrasound; CMC = carpometacarpal; CRP = C-reactive protein; DSA = digital subtraction angiography; ESR = erythrocyte sedimentation rate; GPA = granulomatosis with polyangiitis; IA = inflammatory arthritis; IP = interphalangeal; JIA = juvenile idiopathic arthritis; MCP = metacarpophalangeal; MCTD = mixed connective tissue disease; MRI = magnetic

resonance imaging; MTP = metatarsophalangeal; N/A = not applicable; OA = osteoarthritis; PD = power Doppler; PIP = proximal interphalangeal; PR = polymyalgia rheumatica; PsA = psoriatic arthritis; pSS = primary Sjogren syndrome; RA = rheumatoid arthritis; RTX = rituximab; SLE = systemic lupus erythematosus; SMI = superb microvascular imaging; SpA = spondyloarthropathy; SWE = shear-wave elastography; UA = unclassified arthritis; US = ultrasound.

\*2 SpA, 2 PR, 2 OA, 1 SLE, 1 MCTD, 1 AOSD, 1 GPA, 1 UA, 1 sarcoidosis.
